1 **RAPPID: Towards Generalisable Protein Interaction Prediction with AWD-LSTM Twin Networks**

2

3

4

5 Joseph Szymborski<sup>1,2</sup> and Amin Emad<sup>1,2,3,\*</sup>

<sup>1</sup> Department of Electrical and Computer Engineering, McGill University, Montréal, QC, Canada

<sup>2</sup> Mila, Quebec AI Institute, Montréal, QC, Canada

<sup>3</sup> The Rosalind and Morris Goodman Cancer Institute, Montréal, QC, Canada

6 \* Corresponding Author:

7 Amin Emad

8 755 McConnell Engineering Building

9 3480 University Street

10 Montréal, QC, Canada, H3A 0E9

11 Email: [amin.emad@mcgill.ca](mailto:amin.emad@mcgill.ca)

## 12 **ABSTRACT**

13 **Motivation:** Computational methods for the prediction of protein-protein interactions, while  
14 important tools for researchers, are plagued by challenges in generalising to unseen proteins.  
15 Datasets used for modelling protein-protein predictions are particularly predisposed to  
16 information leakage and sampling biases.

17 **Results:** In this study, we introduce RAPPID, a method for the Regularised Automatic  
18 Prediction of Protein-Protein Interactions using Deep Learning. RAPPID is a twin AWD-  
19 LSTM network which employs multiple regularisation methods during training time to learn  
20 generalised weights. Testing on stringent interaction datasets composed of proteins not seen  
21 during training, RAPPID outperforms state-of-the-art methods. Further experiments show that  
22 RAPPID's performance holds regardless of the particular proteins in the testing set and its  
23 performance is higher for biologically supported edges. This study serves to demonstrate that  
24 appropriate regularisation is an important component of overcoming the challenges of creating  
25 models for protein-protein interaction prediction that generalise to unseen proteins. Additionally,  
26 as part of this study, we provide datasets corresponding to several data splits of various  
27 strictness, in order to facilitate assessment of PPI reconstruction methods by others in the future.

28 **Availability and Implementation:** Code and datasets are freely available at  
29 <https://github.com/jszym/rappid>.

30 **Contact:** amin.emad@mcgill.ca

31 **Supplementary Information:** Online-only supplementary data is available at the journal's  
32 website.

33

## 34 INTRODUCTION

35 Interactions of proteins with other proteins and their surroundings are fundamental to the internal  
36 machinery of a cell. These interactions are of particular interest, as it is essential for a bevy of  
37 diverse cellular functions: from organising cell structure to generating metabolic energy (Huttlin  
38 *et al.*, 2017). These interactions are typically validated with a high degree of confidence by the  
39 many biological assays commonly employed today, each with their own specific advantages and  
40 challenges (Snider *et al.*, 2015). Assays for validating protein interactions range from the  
41 venerable yeast two hybrid (Y2H) (Vidal and Fields, 2014) which researchers have relied on for  
42 the past decades, to more recent Biotin-related techniques such as BioID-MS (Roux *et al.*, 2012).  
43 A characteristic of all these assays, however, is that they are costly in terms of time, labour, and  
44 materials. A further complication of protein-protein interaction studies are the multiple sources  
45 of biases that plague small and large datasets alike. The choice of proteins to include in a study  
46 poses a particular threat of so-called “bait bias” in smaller datasets, while large datasets suffer  
47 from biases in the discovered protein interactions (“prey bias”) as well as the exacerbation of  
48 laboratory biases when included in aggregated datasets (Gillis *et al.*, 2014). Entire classes of  
49 proteins, such as membrane proteins, which are sometimes difficult to experimentally validate  
50 are often under-represented in these interaction studies as well.

51

52 Computational approaches to predict protein-protein interactions (PPIs) are therefore useful to  
53 help towards reducing the number of costly experiments researchers are required to perform.  
54 Researchers have deployed many diverse approaches to solve the task of protein sequence-based  
55 interaction prediction. Most sequence-based methods rely on the understanding that co-evolution  
56 and co-expression of proteins are both tied to protein interaction and sequence similarity (Cong

57 *et al.*, 2019; Jansen, 2003). Some methods rely on substitution matrices for sequence alignment  
58 such as BLOSUM or PAM in combination with machine learning methods to predict interactions  
59 (Henikoff and Henikoff, 1992; Ding *et al.*, 2016). Other methods utilise Support Vector  
60 Machines (SVMs) with kernels specifically designed for use with protein sequences (Ben-Hur  
61 and Noble, 2005). Other statistical methods including naïve bayes (NB) and *k*-nearest neighbors  
62 (kNN) have been used to predict protein interactions from protein sequences (Browne *et al.*,  
63 2007). Some of the most successful PPI prediction methods belong to the family of methods that  
64 rely on novel substring search algorithms (Li and Ilie, 2017; Dick *et al.*, 2020), operating  
65 similarly to sequence search tools like BLAST (Altschul *et al.*, 1990). Deep learning models  
66 have also been designed for predicting protein interactions (Chen *et al.*, 2019). These deep  
67 approaches commonly either learn wide networks or share weights in a twin design; the latter  
68 being shown to be both more efficient and effective (Richoux *et al.*, 2019).

69

70 Such methods, however, face many challenges due to the nature of the data on which they train.  
71 Arguably the most pervasive of which is the ability of models to generalise and predict the  
72 interactions of proteins previously unseen by the prediction method. To ensure such  
73 generalisability, careful cross-validation techniques must be used to avoid data leakage. While  
74 the necessity of appropriate cross-validation techniques is not unique to this area of research, the  
75 application of these networks (e.g., PPIs, transcriptional regulatory networks) to obtain  
76 biological insights makes it particularly important to address this challenge in the task of  
77 biological network reconstruction (Park and Marcotte, 2012; Tabe-Bordbar *et al.*, 2018).

78

79 For PPI reconstruction, developing generalizable models prove particularly difficult. The nature  
80 of PPI networks makes it easy to create datasets with testing/training splits which leak  
81 information, resulting in inflated performance metrics that cannot properly assess the  
82 generalisability of these methods. In particular, simply splitting interaction datasets into training  
83 and testing sets using random selection of edges results in the construction of testing datasets that  
84 are almost entirely comprised of interactions between proteins found in the training set. Indeed,  
85 Park and Marcotte in 2012 found that all the PPI prediction models they surveyed were tested on  
86 such naïvely constructed datasets (Park and Marcotte, 2012). The surveyed models, which had  
87 optimised their performance on these naïve datasets, that suffered from a large degree of  
88 information leakage, were also found to incur precipitous falls in their prediction metrics when  
89 tested on datasets where no proteins in the testing set occurred in the training dataset.

90  
91 When faced with obstacles in the construction of generalisable models, strategic and targeted  
92 applications of regularisation at training time can significantly improve results. This is  
93 particularly relevant in the context of deep learning methods which pay for their expressiveness  
94 by learning an outsized number of parameters. Among the most common regularisation  
95 techniques used in the deep learning context is "dropout" (Srivastava *et al.*, 2014). Applying  
96 dropout to a layer consists of randomly zeroing the activations of the previous network with  
97 some probability  $p$ . However, choice of regularisation techniques must be selected with care and  
98 in accordance with the architecture. For example, applying dropout directly to the hidden state of  
99 Recurrent Neural Networks (RNNs) (Lipton *et al.*, 2015), an architecture which lends itself  
100 naturally to sequential inputs such as amino acid chains, impairs its ability to retain its memory  
101 of previous inputs (Zaremba *et al.*, 2015).

102 Applying regularisation to RNNs requires additional considerations. Recent work by Merity *et*  
103 *al.* has demonstrated that randomly zeroing the weights of RNNs (“dropconnect”) (Wan *et al.*,  
104 2013) rather than their hidden state activation (“dropout”) effectively reduces testing error  
105 (Merity *et al.*, 2017). Merity *et al.* describe applying dropout to the embedding layer as well as  
106 using an averaged optimiser (NT-ASGD) as part of a series of regularisation techniques dubbed  
107 Averaged Weight-Dropped Long Short-Term memory (AWD-LSTM). The regularisation  
108 techniques used by AWD-LSTM models are specifically selected for their suitability in the  
109 context of training RNNs.

110

111 To meet the generalisation challenges posed by PPI prediction tasks, we developed a method  
112 called the Regularised Automatic Prediction of Protein-Protein Interactions using Deep  
113 Learning, or RAPPID. RAPPID addresses the challenges in creating generalised models for  
114 PPI prediction by adopting (with modification) the AWD-LSTM, a regularised recurrent neural  
115 network training routine (Merity *et al.*, 2017). In this study, we showed that RAPPID  
116 outperforms state-of-the-art PPI prediction methods on strict validation datasets constructed in  
117 accordance with guidelines set out by Park & Marcotte (Park and Marcotte, 2012). Additionally,  
118 we performed various analyses and applied RAPPID to different use-cases to show-case the  
119 effect of different components of its architecture and training on its performance and its  
120 applicability to different real-world scenarios.

121

122 It is worth mentioning that in addition to RAPPID’s code, we have made various pre-processed  
123 datasets freely available in the hope that they facilitate the evaluation of protein interaction

124 prediction methods on datasets that both mitigate information leakage and are appropriately large  
125 for deep learning applications.

126

127

## 128 **METHODS**

### 129 **PPI prediction using AWD-LSTM Twin Networks**

130 RAPPID is first trained by considering pairs of amino acid sequences of proteins along with a  
131 label indicating whether they do or do not interact. The amino acid sequences are first tokenised  
132 using the Sentencepiece algorithm (Kudo and Richardson, 2018), which allows for better  
133 recognition of common groupings of amino acid residues that make up the secondary structure  
134 and motifs of proteins. Fixed-length latent vector representations of the token sequences of both  
135 proteins are then computed by twin neural networks (Bromley *et al.*, 1993), forming the encoder  
136 of RAPPID's pipeline. These twin networks have shared architectures and weights and are  
137 trained jointly. An overview of the pipeline is provided in Figure 1.

138

139 Each twin network consists of a two-layer bidirectional AWD-LSTM network (Merity *et al.*,  
140 2017), which takes a tokenised amino acid sequence as its input and generates a fixed-length  
141 latent vector representation as its output. AWD-LSTMs are architecturally identical to the  
142 LSTMs (Hochreiter and Schmidhuber, 1997), however at inference time, several regularisation  
143 techniques are employed while training to promote learning generalised weights. Among these  
144 regularisation techniques are an averaged optimizer and dropout applied to embeddings and  
145 LSTM weights (Athiwaratkun *et al.*, 2019; Wan *et al.*, 2013). Using an AWD-LSTM encoder

146 enables RAPPID to leverage the strong inductive biases of LSTMs, while ensuring that the  
 147 learned weights are generalised.

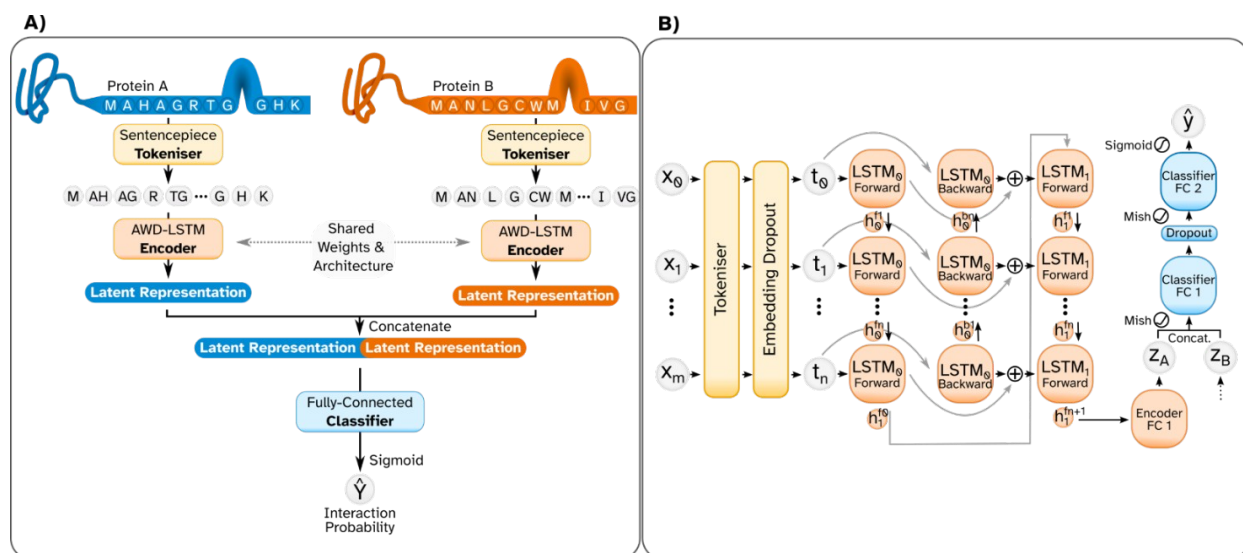

148  
 149 **Figure 1: Overview of the RAPPID pipeline and architecture.** (A) The pipeline of the  
 150 RAPPID begins with two protein sequences. Each sequence is first tokenised by the  
 151 Sentencepiece tokeniser (yellow). Each sequence of tokens is then inputted separately into an  
 152 AWD-LSTM encoder layer which results in a latent representation for each protein. The latent  
 153 representations of each protein are inputted into a fully-connected classifier layer. The classifier  
 154 layer outputs the predicted probability of the two proteins interacting. (B) Taking a closer look at  
 155 the architecture of the RAPPID, individual residues  $x_0$  to  $x_m$  for a protein comprised of  $m$   
 156 residues are tokenized into  $n$  tokens  $t_0, t_1, \dots, t_n$ . The embedding dropout layer randomly assigns  
 157 random tokens from the total vocabulary to zero. The encoder layer is comprised of a multi-layer  
 158 bidirectional LSTM whose last hidden state is fed to a fully connected layer before outputting a  
 159 latent representation  $z_A$ .  $z_A$  is then concatenated with the latent representation of a second protein  
 160 ( $z_b$ ) before being inputted into the two-layer fully-connected classifier. The output of the  
 161 classifier is activated by the sigmoid function to produce a probability of interaction.

162  
 163 The final hidden state of the AWD-LSTM is passed to a single fully-connected layer whose  
 164 output, once activated by the Mish function (Misra, 2020), is the latent representation of the  
 165 amino acid sequences. The latent representations of both proteins are then concatenated and  
 166 provided as inputs to the classifier network which generates an interaction probability for each  
 167 protein pair. The classifier network is a two-layer fully-connected network that outputs a single



168 logit whose sigmoid activation serves as the probability of the two proteins interacting. The  
169 activated logit is then used to calculate the mean binary cross-entropy loss. Relegating the  
170 pairwise comparison of proteins to the shallower classifier network allows RAPPID to infer  
171 protein interactions in an efficient manner. Figure 1 provides an overview of RAPPID’s  
172 pipeline.

173

174

### 175 **Sequence Segmentation and Tokenisation**

176 As mentioned earlier, RAPPID utilises the Sentencepiece algorithm (Kudo and Richardson,  
177 2018) to tokenize amino acid sequences. While words form the basis of many natural languages  
178 and may break up sentences and phrases into discrete units, no such higher-order segmentation is  
179 as immediately apparent in amino acids. Motifs and protein domains possess many analogous  
180 qualities to words in natural languages; they appear repeatedly in amino acid sequences and their  
181 combination and relative position in these sequences play important roles in the protein structure  
182 and function (Anfinsen, 1973).

183

184 Much like words, however, motifs and protein domains present an “out-of-vocabulary” problem,  
185 where unseen examples are difficult to handle. Attempts to solve this problem in natural  
186 language processing tasks has resulted in “subword” segmentation algorithms, particularly in  
187 difficult-to-segment languages such as Japanese which do not separate words by spaces (Schuster  
188 and Nakajima, 2012). Here, we employ the Sentencepiece algorithm (Kudo and Richardson,  
189 2018) to sample tokens from “subword” vocabularies generated by the Unigram algorithm  
190 (Kudo, 2018). The unigram and sentencepiece algorithms construct vocabularies of arbitrary size

191 by modelling the probabilities of subwords and provides a principled manner for sampling from  
192 this distribution to reconstruct sequences. The multi-residue tokens that comprise the vocabulary  
193 subdivide low-entropy areas and reduce the overall length of the sequences encoded.

194

195

## 196 **Generalising Protein Sequence Encoding with AWD-LSTM**

197 The task of protein-protein interaction prediction on unseen proteins is a difficult problem prone  
198 to overfitting, as demonstrated by the poor testing performance of various methods on unseen  
199 proteins (Park and Marcotte, 2012). For this reason, a training and optimisation methodology that  
200 allows efficient regularisation is desirable. AWD-LSTM was recently devised to enable efficient  
201 training of generalisable recurrent neural networks (RNNs) (Merity *et al.*, 2017). This approach  
202 deploys several regularisation techniques during training to achieve this goal. RAPPID adopts,  
203 with modification, the training methodology of AWD-LSTM.

204

205 RAPPID utilises Embedding Dropout, DropConnect (Wan *et al.*, 2013), and Weight Decay  
206 (Loshchilov and Hutter, 2019) on the LSTM weights, as described by AWD-LSTM, in the  
207 encoder during training. Both AWD-LSTM and RAPPID optimise over average weights,  
208 however the optimisers are quite different. AWD-LSTM makes use of the non-monotonically  
209 triggered averaged stochastic gradient descent (NT-SGD) optimiser which switches between  
210 stochastic gradient descent (SGD) and the averaged variant (ASGD). RAPPID uses the recent  
211 Stochastic Weight Averaging (SWA) strategy in combination with the Ranger21 optimiser  
212 (Athiwaratkun *et al.*, 2019; Wright and Demeure, 2021).

213

214 SWA has been shown to promote generalisable models in part by overcoming the challenges of  
215 finding best solutions within flat loss basins (Izmailov *et al.*, 2019). Ranger21 is an optimiser that  
216 applies the “Lookahead mechanism” (Zhang *et al.*, 2019) to the AdamW optimiser (Loshchilov  
217 and Hutter, 2019) and includes several optimisation techniques (Wright and Demeure, 2021).  
218 These techniques, which include gradient centralisation and adaptive gradient clipping, enable us  
219 to further improve our ability to learn generalised weights and smooth training trajectories  
220 (Brock *et al.*, 2021; Yong *et al.*, 2020). Finally, since RAPPID does not rely on the timestep  
221 outputs of the LSTM network, the Temporal Regularisation (TAR) described by AWD-LSTM is  
222 not applicable.

223

224

### 225 **Details of RAPPID’s architecture and hyperparameter tuning**

226 The dimensionality of the AWD-LSTM hidden state is made equal to the dimensionality of the  
227 embeddings (*i.e.*, 64). The output of the fully-connected layer is of equal dimensionality to that  
228 of the AWD-LSTM hidden state and is activated by the Mish activation function (Misra, 2020).  
229 The output of the first fully-connected layer is half the size of the embedding dimension,  
230 activated by the Mish function, and regularised by a dropout layer (Srivastava *et al.*, 2014).  
231 RAPPID trains on a vocabulary of 250 tokens that is generated by the Sentencepiece algorithm.  
232 New vocabularies are generated for each dataset before training.

233

234 The number of LSTM layers, L2 coefficient, and various dropout rates are defined as hyper-  
235 parameters that require tuning between different datasets. Hyper-parameters were selected by  
236 cross-validation. The range of considered hyperparameters and their selected values are provided

237 in the Supplementary Tables S1-S2 (in Supplementary File 1). The chosen hyper-parameter  
238 ranges are a compromise between common, reasonable values and maintaining a manageable  
239 hyper-parameter space which can be explored practically.

240

241

## 242 **Protein Interaction Datasets**

243 We obtained protein-protein interactions (PPIs) and protein sequences from version 11 of the  
244 Search Tool for the Retrieval of Interacting Genes/Proteins (STRING) database (Szklarczyk *et*  
245 *al.*, 2019), from the official STRING website. Edges were downloaded from [https://stringdb-](https://stringdb-static.org/download/protein.links.detailed.v11.0.txt.gz)  
246 [static.org/download/protein.links.detailed.v11.0.txt.gz](https://stringdb-static.org/download/protein.links.detailed.v11.0.txt.gz) and sequences were downloaded from  
247 <https://stringdb-static.org/download/protein.sequences.v11.0.fa.gz>. In this dataset, the association  
248 between any two proteins is assigned a confidence score depending on the source of the  
249 information (called a “channel”). In our analyses, only associations with a combined STRING-  
250 score above 95% (equivalent to a score above 950, obtained from combining different channels)  
251 were considered as positive edges. We also retained the channel-specific scores for further  
252 analysis.

253

254 To obtain an estimate of the false-positive rate of the confidence score-filtered STRING dataset,  
255 we leveraged the curated and experimentally validated non-interacting protein pairs from the  
256 Negatome dataset (Blohm *et al.*, 2014). By comparing the set of proteins that are in both  
257 STRING and Negatome, and evaluating the number of negative edges in Negatome that were  
258 considered a positive edge in this intersection, we estimated the false-positive rate of our

259 STRING dataset to be 4.01%. This false-positive rate is within the expected 5% upper-bound  
260 given by our 95% confidence threshold.

261

262 PPI graphs are understood to be scale-free in the general case. This property of PPI graphs can  
263 make them challenging datasets upon which to train a generalised model, as some proteins can  
264 be over-represented. To characterise the extent to which proteins are represented in the dataset,  
265 we calculated the distribution of the relative degree of proteins in the network (Supplementary  
266 Figure S1A-C). The vast majority of proteins (upwards of 85%) have edges with fewer than 1%  
267 of proteins within their dataset split (*i.e.*, train/validation/test). The protein with the highest  
268 degree is CDC5L which has a relative degree of just over 10%, while the second highest has a  
269 relative degree of 6.2% (Supplementary Figure S1D-F).

270

271

## 272 **Negative Examples**

273 The preparation of datasets of pairs of proteins which are known not to interact with one another  
274 is a fraught process. Various methods are typically deployed to create such datasets, which are  
275 integral for machine learning methods as they typically require negative examples. Ideally, only  
276 negative examples are entirely composed of non-interacting protein pairs which are  
277 experimentally verified and manually curated, such as the Negatome database (Blohm *et al.*,  
278 2014).

279

280 Unfortunately, non-interacting pairs are difficult to experimentally validate. As a result, there are  
281 far fewer *H. sapiens* negative protein pairs in such datasets such as Negatome than positive

282 protein pairs in databases such as STRING. Precisely, there are 1,191 negative *H. sapiens* pairs  
283 in Negatome, and 263,130 positive pairs above a 95% confidence threshold in STRING (only  
284 pairs comprised of proteins present in UniprotKB were included in this analysis). The resulting  
285 class imbalance is detrimental to learning performant, generalisable models.

286

287 Synthetic negative pairs are often used to compensate for the small number of experimentally  
288 verified non-interacting pairs is construction of synthetic negative pairs. A common method for  
289 constructing negative pairs is to select pairs of proteins from distinct sub-cellular compartments.  
290 This method has unfortunately been shown to result in biased samples according to multiple  
291 measures (Ben-Hur and Noble, 2006). Selecting pairs at random from the space of pairs not  
292 known to interact has proven to evade such biases, but runs the risk of capturing yet unknown  
293 false-negatives. Unless otherwise noted, RAPPID utilises synthetic random pairs of proteins  
294 which are not known to interact.

295

296

### 297 **Training, Validation and Testing Set Construction**

298 As identified by Park and Marcotte (Park and Marcotte, 2012), methods which consider the  
299 interaction of proteins in a pairwise fashion must (and have historically failed to) take additional  
300 care to avoid information leakage when constructing training and testing datasets. Following  
301 their suggestion, here we use three different classes of testing and training sets to evaluate the  
302 performance of RAPPID and other algorithms (Figure 2).

303

304 1) “C1” refers to the evaluation scheme in which edges (pairs of proteins) are randomly selected  
305 to form the training or testing sets. Since the selection criterion is based on edges, both proteins  
306 in the pair may be present in both the testing and training sets (due to the presence of other edges  
307 adjacent to each protein).

308 2) “C2” refers to the evaluation scheme in which proteins are randomly selected to form the  
309 training or testing sets. In this scheme, only one protein in a pair may be present in both testing  
310 and training sets (but never both). This evaluation scheme mimics the scenario in which a model  
311 trained on the interactome is used to predict the interaction of known proteins with a newly  
312 discovered protein (that was not used to train the model).

313 3) “C3” refers to the evaluation scheme in which proteins are randomly selected to form the  
314 training or testing sets. However, unlike C2, proteins which appear in the training set never  
315 appear in the testing set. This is the most strict evaluation scheme.

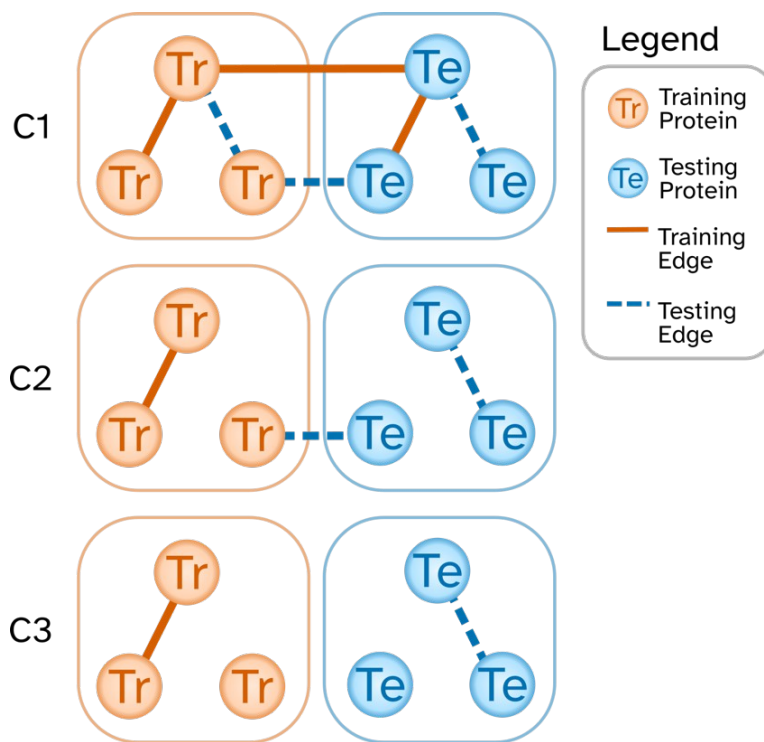

316

317 **Figure 2: Illustration of differences in edges between C1, C2, and C3 datasets.** Differences  
318 between C1, C2, and C3 datasets are most visible by first dividing the population of all proteins  
319 in the dataset into training (orange, left) and testing (blue, right). In the case of the strict C3  
320 dataset (bottom row), edges known at training time (orange, solid) only occur between training  
321 proteins. Similarly, C3 datasets are evaluated on testing edges (blue, dotted) that only occur  
322 between testing proteins. The C2 dataset has all the edges present in the C3 dataset, but also  
323 includes testing edges between testing proteins and training proteins. Finally, the pervasive C1  
324 datasets allows all possible training and testing edges that are not identical.

325

326 While most methods have typically reported on models validated with datasets in the C1 class,  
327 they often perform much worse on similar datasets in the more conservative C2 and C3 class.  
328 This is likely due to the information leakage between training and testing sets present in the C1  
329 class and, to a lesser extent, in the C2 class. In our evaluations, we report the performance of  
330 different methods using all three evaluation schemes above, but we are most interested in the  
331 results of C3 due to a lack of information leakage.

332



333 In the C-type datasets we've created, there are approximately 9.3 thousand proteins. The number  
334 of edges in the datasets range from just over 263 thousand edges in the C1 dataset to just under  
335 174 thousand edges in the C3 dataset. Full dataset statistics are presented in Supplementary  
336 Table S3. These C-type datasets are made freely available to the public, with instructions on how  
337 to download them at <https://github.com/jszym/rappid/tree/main/data>. We've made these  
338 datasets available in the hope that it facilitates the evaluation of protein interaction prediction  
339 methods on datasets that both mitigate information leakage and are appropriately large for deep  
340 learning applications. The adoption of C-type datasets for training and evaluation of PPI  
341 prediction methods is important for accurate and representative benchmarking.

342

343

#### 344 **Implementation**

345 RAPPID was implemented in the Python computer language using the PyTorch and PyTorch  
346 Lightning deep learning framework (Paszke *et al.*, 2019; Falcon *et al.*, 2020). Embedding  
347 Dropout and DropConnect implementation were obtained from the AWD-LSTM code base  
348 (Merity *et al.*, 2017). The source code for RAPPID can be found by visiting  
349 <https://github.com/jszym/rappid>. RAPPID was trained at a rate of approximately 2.7 training  
350 steps per second at a batch size of 80 protein pairs on an NVIDIA RTX 2080 GPU and 32 CPU  
351 cores clocked at 2.2 GHz. The C3 model takes approximately 2.4 hours to train, while C1 and C2  
352 take approximately 7.8 hours.

353

354

355

## 356 **Protein Similarity Experiments**

357 In the analysis of the sequence similarity between testing and training proteins, “Percent  
358 Identity” was measured between proteins using NCBI’s PSI-BLAST tool running locally as part  
359 of version 2.12.0 of NCBI’s BLAST+ software suite (Altschul *et al.*, 1997). In addition to the  
360 Percent Identity, for two proteins to be considered similar, an E-value cut-off of at most 5 and an  
361 alignment length of more than 30% of the query sequence were considered necessary. The 64-bit  
362 Linux binaries of the BLAST+ suite were obtained from the link  
363 <ftp.ncbi.nlm.nih.gov/blast/executables/blast+/2.12.0/>.

364

365

## 366 **Results**

### 367 **Performance evaluation of RAPPID and other algorithms**

368 To establish the ability of RAPPID to correctly predict protein-protein interactions within the  
369 current landscape of PPI prediction methods, we compared it against three recent methods  
370 (Figure 3). The first of these is the Scoring Protein INteractions (SPRINT) method, which  
371 belongs to the family of methods that predict interactions according to measures of sequence  
372 similarity (Li and Ilie, 2017). SPRINT was shown to outperform support-vector machine  
373 (SVM), random-forest (RF), and sequence similarity-based methods across C1, C2, and C3-like  
374 datasets.

375

376 The two other methods, PIPR and DeepPPI, are deep learning methods that similar to RAPPID  
377 utilize twin networks (Chen *et al.*, 2019; Richoux *et al.*, 2019). PIPR uses a residual recurrent  
378 convolutional neural network (RCNN) for its encoder with the goal of more effectively

379 summarising both local and global features. We compared RAPPPID against the best performing  
380 iteration of DeepPPI, whose encoder comprises of a convolutional neural network feature  
381 extractor followed by an LSTM network. All three methods required retraining, as the available  
382 weights of these models belong to diverse datasets, all of which are either not C2 or C3 type, or  
383 (in the case of SPRINT) are insufficiently large for training a generalisable deep learning model.  
384

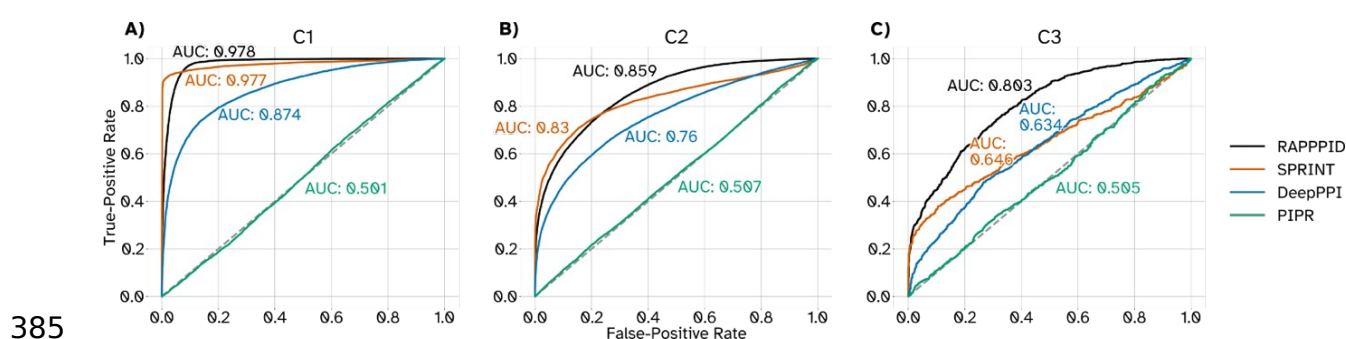

386 **Figure 3. Receiver-Operator curves across methods and datasets.** The receiver-operator  
387 curves (ROCs) for all four methods tested across C1 (A), C2 (B), and C3 (C) datasets.

388

389 Across C1, C2, and C3 testing datasets, RAPPPID achieved higher area under the receiver-  
390 operator curve (AUROC) than all other methods tested (Table 1). The margin between RAPPPID  
391 and the second highest performing method (SPRINT in all cases) was highest when performed  
392 on the stricter C3 dataset, resulting in approximately a 24.3% improvement. The improvement  
393 obtained by RAPPPID compared to SPRINT was lower on the C2 dataset (approximately 3.4%),  
394 and finally nearly equivalent on the least strict C1 dataset.

395

396 With regards to the area under the precision-recall curve (AUPR), this trend across dataset types  
397 persisted. RAPPPID's AUPR was higher than all other methods for the C3 dataset, with a margin

398 to the second highest method of 0.094 (equivalent to an approximately 14.6% improvement).  
399 RAPPID's AUPR score was matched by SPRINT in experiments conducted on the C2 dataset,  
400 but outperformed DeepPPI and PIPR. SPRINT achieved the highest AUPR of all the methods in  
401 the C1 dataset, outperforming RAPPID with a margin of 0.009 (equivalent to an approximately  
402 0.9% improvement).

403 **Table 1: Comparison of PPI prediction performance on C1, C2, and C3 datasets.** The  
404 testing AUROC and AUPR of four different PPI prediction methods is reported across the three  
405 different dataset types described by Park & Marcotte (Park and Marcotte, 2012).

| Dataset | Method  | Testing AUROC | Testing AUPR |
|---------|---------|---------------|--------------|
| C1      | RAPPID  | <b>0.978</b>  | 0.974        |
|         | SPRINT  | 0.977         | <b>0.983</b> |
|         | DeepPPI | 0.874         | 0.881        |
|         | PIPR    | 0.501         | 0.405        |
| C2      | RAPPID  | <b>0.859</b>  | <b>0.868</b> |
|         | SPRINT  | 0.830         | <b>0.868</b> |
|         | DeepPPI | 0.760         | 0.787        |
|         | PIPR    | 0.507         | 0.508        |
| C3      | RAPPID  | <b>0.803</b>  | <b>0.810</b> |
|         | SPRINT  | 0.646         | 0.716        |
|         | DeepPPI | 0.574         | 0.590        |
|         | PIPR    | 0.505         | 0.509        |

406  
407 While we were able to replicate results of the PIPR model on the *S. cerevisiae* dataset published  
408 as part of the original PIPR publication (Chen *et al.*, 2019), PIPR suffered from convergence  
409 issues during training on our *H. sapiens* STRING datasets. We suspect this is due to a variety of  
410 factors, with the large differences in dataset characteristics being the most likely cause. The  
411 number of proteins and interactions in the *S. cerevisiae* dataset is far smaller than our STRING

412 datasets. Furthermore, the *S. cerevisiae* dataset selected pairs of proteins which occupy different  
413 subcellular compartments in order to construct negative samples; an approach found to lead to  
414 biased estimations of prediction accuracy (Ben-Hur and Noble, 2006).

415

416 Taken together, these results suggest that RAPPID outperforms alternative methods in the  
417 majority of evaluations on C1, C2, and C3 schemes and is particularly effective in the stricter and  
418 more difficult C3 evaluation.

419

420

#### 421 **Channel-specific performance of RAPPID**

422 The STRING database, integrates and annotates protein association data from a wide range of  
423 sources. The “database”, “text-mining”, “experiments”, and “coexpression” channels make-up  
424 the majority of the edges in our datasets (e.g., 98.4% of all the edges in the C3 dataset).

425

426 The “database” channel is comprised of several curated databases of interactions such as KEGG  
427 and Reactome (Kanehisa, 2000; Jassal *et al.*, 2019). Edges in the “text-mining” channel are the  
428 result of a statistical analysis of proteins whose names and/or identifiers co-occur in publications.

429 The “experiments” channel is populated by interactions evidenced by high-throughput

430 experiments curated by members of the International Molecular Exchange (IMEx) consortium

431 (Orchard *et al.*, 2012). This includes datasets such as IntAct, DIP, the BioGRID, and many

432 others (Orchard *et al.*, 2014; Salwinski *et al.*, 2004; Oughtred *et al.*, 2020). Finally, the

433 “coexpression” channel arises from proteomic and transcriptomic assays which quantify gene-

434 by-gene correlations. STRING additionally assigns calibrated confidence scores to each of the

435 edges which summarise the evidence supporting an edge. Scores are assigned to each edge by  
436 channel, and finally harmonised into a final “combined confidence score” which represents the  
437 evidence across all channels present in STRING.”

438

439 To better characterise the results of our protein-protein prediction tests, we sought to identify the  
440 source of the testing edges RAPPID correctly and incorrectly identified. Figure 4A and  
441 Supplementary Figure S2 show that RAPPID can accurately predict the testing set edges that  
442 have a high confidence score in biologically supported channels of co-expression, experiments,  
443 and database. However, the accuracy for the edges that have a high confidence score in the text-  
444 mining channel is inferior to the other channels. Since edges that are only supported by text-  
445 mining (but not by the other channels) are arguably the ones most prone to error, we expected  
446 RAPPID to have an inferior performance on such edges (since the edges themselves may not be  
447 reliable). To test whether the inferior performance of RAPPID in the text-mining channel in  
448 Figure 4A are indeed due to such edges, for a fixed threshold  $k$  ( $50 \leq k \leq 95$ ), we divided the  
449 testing edges with a text-mining confidence score at least equal to  $k$  into two groups: a group  
450 with "experiments" confidence score at least equal to 80% and a group with "experiments"  
451 confidence score smaller than 80% (Figure 4B). Evaluating the testing edges in C1, C2, and C3  
452 showed that for this channel, the accuracy on the former group is higher than the latter group  
453 (sometimes as large as ~22% higher, Supplementary Figure S3). Repeating the analysis for co-  
454 expression and database channels also confirmed this trend (Figure 4B, Supplementary Figure  
455 S3). Taken together, these results suggest that the inferior performance of RAPPID on the text-  
456 mining channel in Figure 4A is indeed due to the edges that are supported only by text-mining  
457 and not by other biologically identified channels.

458

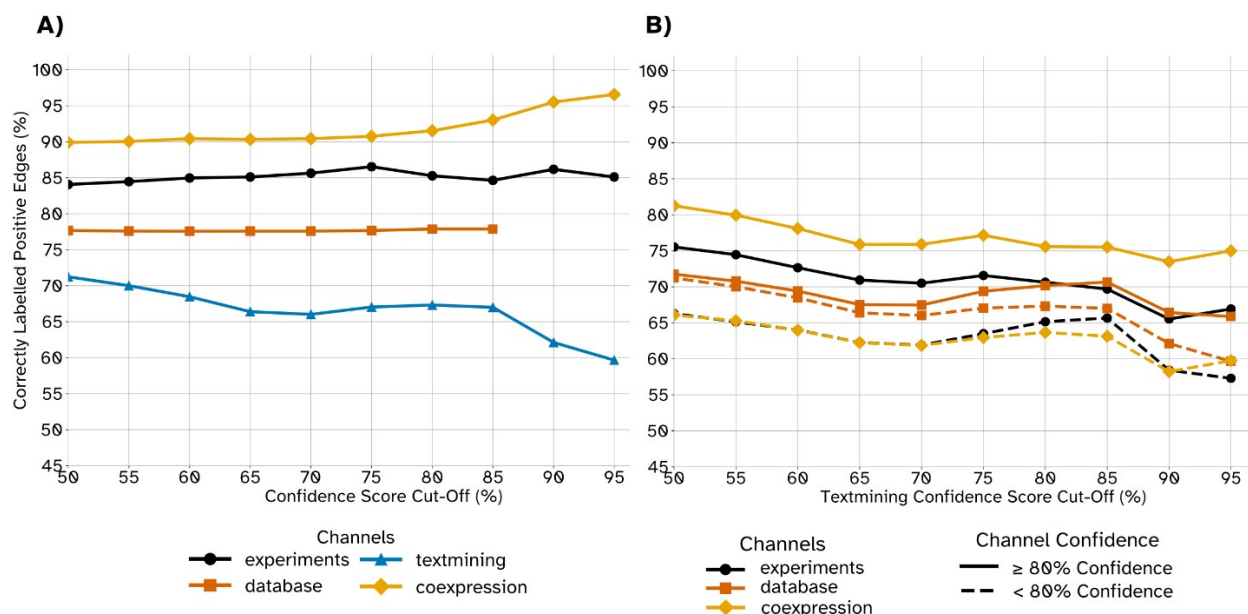

459

460 **Figure 4: Accuracy of positive edges across edge confidence stratified by STRING channels.**

461 (A) The percentage of correctly labelled positive edges are plotted for each major STRING  
462 channel. The x-axis denotes the channel edge confidence cut-off score for each curve's respective  
463 channel. (B) Here, we see a similar chart but rather than using each channel's respective score as  
464 a confidence cut-off, edges are excluded according to their text-mining confidence (x-axis). The  
465 solid curves include edges which have a channel confidence  $\geq 80\%$  for the channel indicated by  
466 the curve's colour. Dashed curves conversely include edges whose channel confidence is  $< 80\%$   
467 for the channel indicated by the curve's colour. In both (A) and (B) data shown reflects the C2  
468 model/dataset.

469

470

#### 471 **Role of Protein Similarity on RAPPID's Performance**

472 The procedures for C2 and C3 datasets were devised to reduce the information leakage by  
473 avoiding testing on edges which contain proteins which are known to an algorithm during its  
474 training. This safeguard against information leakage, however, does not account for proteins  
475 which are known by different identifiers but share near identical protein sequences. Further  
476 complicating the matter, sequence similarity is a valid PPI prediction feature and is often used by

477 methods as a proxy measure of co-evolution and conserved functional domains (Cong *et al.*,  
478 2019; Jansen, 2003). Indeed, this strategy is leveraged by the SPRINT algorithm against which  
479 RAPPID was compared.

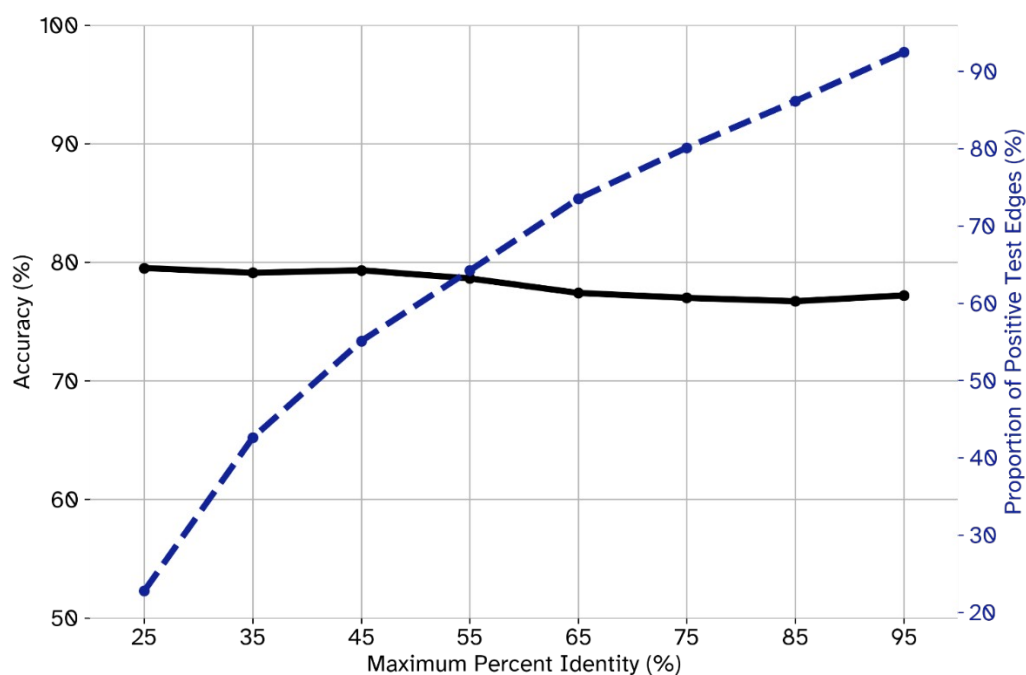

480 **Figure 5: Accuracy of positive edges as a function of similarity between testing and training**  
481 **proteins in C2.** The similarity between testing and training proteins was measured using their  
482 percent identity as computed by NCBI’s PSI-BLAST software. The highest percent identity  
483 between any training protein and a testing protein in a testing edge was considered to be that  
484 testing edge’s “maximum percent identity”. The percentage of accurately labelled positive edges  
485 (black curve, left y-axis) is reported for edges with maximum percent identities lower than the  
486 threshold reported on the x-axis. The proportion of testing edges for each threshold values is  
487 reported by the dashed blue curve and the right y-axis.  
488  
489

490 In spite of the challenges above, we sought to determine whether the superior performance of  
491 RAPPID (particularly in the strict datasets of C2 and C3) is due to sequence similarity between  
492 testing and training proteins or not. For this purpose, we used PSI-BLAST algorithm (Altschul *et*  
493 *al.*, 1997) to evaluate sequence similarities between each pair of testing/training proteins. Figure



494 5 shows the accuracy of RAPPID on the C2 dataset when different degrees of restriction on  
495 sequence similarity are imposed. More specifically, a threshold  $t$  (x-axis in Figure 5) determined  
496 the maximum allowable Percent Identity score between a testing protein and any of the training  
497 proteins that were candidates to be similar to it (see Methods for details). Any testing protein that  
498 did not satisfy this condition for the threshold  $t$  was excluded from the calculation of accuracy.  
499 As one moves towards larger values of  $t$ , the sequence similarity constraint loosens and  $t=100\%$   
500 is equivalent to the complete C2 dataset. Our analysis on C2 (Figure 5) and C3 (Supplementary  
501 Figure S4) revealed that RAPPID's accuracy is largely independent of the sequence similarities  
502 between testing and training proteins and the performance of RAPPID does not deteriorate  
503 when removing testing proteins that have a highly similar training protein.

504

505

### 506 **Effect of different components on RAPPID's performance**

507 To understand RAPPID's performance when trained and tested on negative examples which are  
508 experimentally validated and manually curated, we created a new C3 dataset where the negative  
509 examples are provided by the Negatome database of non-interacting pairs. To combat the large  
510 class imbalance caused by the relatively few pairs of human proteins in Negatome (see Methods  
511 for details), additional random pair negatives were supplemented until both positive and negative  
512 classes had an equal number of samples. After 13 epochs, RAPPID achieved a testing AUROC  
513 of 0.802 and a testing AUPR of 0.799 on C3 dataset, which is comparable to the performance of  
514 RAPPID using randomly selected negative edges.

515

516 Since RAPPID utilizes random initialisation, mini-batch sampling, and token sampling, there is  
517 some stochasticity present in its performance. First, we sought to test the effect of these  
518 stochastic components and to ensure that the specific choice of training and test sets were not  
519 responsible for the superior performance of RAPPID. For this purpose, we ran RAPPID twice  
520 on three additional C3 datasets whose training, validation, and testing proteins were chosen at  
521 random (a total of six times). In each of these runs, different seeds were used to assess the effect  
522 of stochastic components of RAPPID (Table 2). Overall, the average testing AUROC across  
523 models trained on these additional three datasets was 0.792 ( $\pm 0.007$ ). Results from these  
524 repeatability experiments illustrate that RAPPID’s strong performance on C3 datasets is not  
525 tied to a specific set of testing or validation proteins, nor certain weight initialisation states.

526

527 Next, we conducted an ablation study (Table 2) using the same three C3 datasets and two runs of  
528 each variant per dataset (a total of six models per variant). Each variant substitutes one  
529 component of RAPPID’s regularisation, architecture or optimisation, allowing us to quantify  
530 the difference in performance for which these components are responsible. In this table,  
531 “RAPPID-SWA” variant removes SWA, “RAPPID+Adam” replaces Ranger21 with Adam  
532 optimizer (learning rate selected by hyperparameter tuning), “RAPPID-AWD” removes the  
533 AWD regularisation, and “RAPPID-SentencePiece” substitutes the SentencePiece tokens with  
534 amino-acid-residue-level tokens. As can be seen in this table, the choice of optimizer has  
535 negligible effect on the performance. However, SWA, AWD, and SentencePiece tokens all  
536 contribute to the superior performance of RAPPID, with the tokeniser having the largest  
537 contribution. One advantage that SentencePiece affords RAPPID is the regularising effect of  
538 random sampling tokens. Additionally, the SentencePiece tokeniser reduces the total length of

539 sequences inputted into the tokeniser. The protein sequences on which RAPPID is trained,  
540 while limited to 1,500 residues, are sufficiently large enough for gradients to vanish quiet  
541 substantially; a phenomenon long known to plague RNNs when trained on long sequences  
542 (Hochreiter, 1998).

543

544 **Table 3: Results from an ablation study conducted on RAPPID.** Each model is  
545 trained/tested twice on three randomly generated C3 datasets. The performance metrics  
546 correspond to held-out test sets.

|                   | RAPPID<br>(original) | RAPPID-<br>SWA    | RAPPID<br>+Adam   | RAPPID-<br>AWD    | RAPPID-<br>SentencePiece | RAPPID<br>+TransfLG | RAPPID<br>+TransfSM |
|-------------------|----------------------|-------------------|-------------------|-------------------|--------------------------|---------------------|---------------------|
| <b>Test AUROC</b> | 0.792<br>(±0.007)    | 0.782<br>(±0.007) | 0.791<br>(±0.025) | 0.762<br>(±0.020) | 0.749<br>(±0.009)        | 0.670<br>(±0.030)   | 0.747<br>(±0.026)   |
| <b>AUROC Diff</b> | N/A                  | -1.20%            | -0.100%           | -3.70%            | -5.37%                   | -15.3%              | -5.68%              |
| <b>Test APR</b>   | 0.794<br>(±0.009)    | 0.783<br>(±0.007) | 0.792<br>(±0.032) | 0.757<br>(±0.022) | 0.748<br>(±0.011)        | 0.686<br>(±0.040)   | 0.758<br>(±0.025)   |
| <b>APR Diff</b>   | N/A                  | -1.37%            | -0.273%           | -4.62%            | -5.85%                   | -13.6%              | -4.61%              |

547

548

549 In acknowledgment of the recent prevalence and performance of attention-based methods in deep  
550 learning (Vaswani *et al.*, 2017), the sixth and seventh variants replace the AWD-LSTM encoder  
551 with transformers of varying sizes. “RAPPID+TransfLG” has six layers and eight heads and  
552 feed-forward networks with 2048 dimensions, while “RAPPID+TransfSM” has fewer  
553 parameters (two layers, two heads, and 80 dimensions). Both transformer variants have a dropout  
554 rate of 20%. The number of heads and layers in RAPPID+TransfLG were chosen to closely  
555 match those used in the BERT language model (Devlin *et al.*, 2019) whose architecture has been  
556 previously used for predicting protein function (Elnaggar *et al.*, 2021). The number of heads and  
557 layers for RAPPID+TransfSM were chosen to be representative of reasonable lower bounds for

558 those hyper-parameters. The results of these analyses (Table 2) reveal that both of these models  
559 have a worse performance compared to the original RAPPID model. The superior performance  
560 of the small transformer compared to the large one suggests that the large number of parameters  
561 required by transformers are leading to severe overfitting in this task and are the reason behind  
562 the performance deterioration

563

564

### 565 **Transfer Learning on Protein-Ligand Data from X-Ray Crystallography Experiments**

566 RAPPID's strong performance on C3 datasets demonstrate that it is capable of generalising to  
567 predictions between proteins absent from the training set. Additionally, the ability to generalise  
568 these models to make predictions on test datasets that are not representative of the training data  
569 (e.g., different types of experiments or protocols are used to generate them) is also often  
570 desirable, yet is often much more challenging. Transfer learning is one approach that can be used  
571 to overcome the challenges imposed by differences between training and test datasets. Transfer  
572 learning is the process by which a network is first trained on a large, high-quality dataset. Many  
573 of these weights are then "frozen" such that they are no longer backpropagated through, while  
574 the remaining "unfrozen" weights are trained on a dataset that is often smaller and/or belong to a  
575 different input distribution (Yosinski *et al.*, 2014). Here, we use this approach to tackle an  
576 interaction prediction task on a dataset that differs fundamentally from STRING: protein-ligand  
577 interactions and sequences as determined from X-ray crystallography data.

578

579 STRING and similar PPI datasets curate interactions from a wide range of modalities and  
580 provide sequences from reference proteomes. We've constructed a protein-ligand interaction task

581 by leveraging BioLiP, a semi-manually curated list of X-ray crystallography experiments  
582 recorded in the Protein Data Bank (PDB) which reflect interactions between proteins and ligands  
583 (Yang *et al.*, 2012; Berman, 2000). Using these datasets, we were able to extract sequences from  
584 the PDB records and, after filtering out interactions with low-quality sequences, construct a  
585 novel protein-ligand dataset. This dataset is available for download at  
586 <https://github.com/jszym/rapppid>. The sequences extracted from PDB are measured by  
587 fundamentally different modalities from those present in STRING/UniprotKB, and are often  
588 truncated and incomplete as a result. Furthermore, the nature of the interactions recorded by  
589 BioLiP are fundamentally different from STRING. Whereas STRING catalogues interactions  
590 between large classes of proteins, the nature of X-ray crystallography biases captured  
591 interactions to those with slower molecular dynamics and which do not primarily exist in  
592 aliphatic environments (Carpenter *et al.*, 2008). These fundamental differences between BioLiP  
593 and STRING make them ideal datasets to illustrate the ability to use transfer learning with  
594 RAPPID.

595

596 We first pre-trained RAPPID on data from STRING, and then fine-tuned it on the BioLiP  
597 dataset after the LSTM encoder weights were frozen, leaving only the fully-connected classifier  
598 to be trained. To ensure no data leakage between the STRING and BioLiP datasets exist, protein  
599 sequences in STRING determined to have more than 90% identity with those in BioLiP were  
600 moved from the pre-training dataset to the fine-tuning dataset. C3-type training, validation, and  
601 testing splits were constructed for both the pretraining and fine-tuning datasets for evaluation  
602 purposes. Using this approach, RAPPID pre-trained on the STRING dataset and fine-tuned on a  
603 portion of the BioLiP dataset achieved an AUROC of 0.909. To test our hypothesis that transfer

604 learning is indeed necessary to achieve good performance on this dataset, we also directly  
605 applied the pre-trained RAPPID model (without any fine-tuning on BioLip) to the BioLip test  
606 split. As expected, this resulted in almost random results (AUROC = 0.548). These results  
607 highlight the difficulties of generalising a model to fundamentally different datasets and  
608 emphasise the utility of transfer learning to achieve good performance using RAPPID in such  
609 scenarios.

610

611

### 612 **RAPPID predicts interaction of HER2 with Trastuzumab and Pertuzumab**

613 Peptides and proteins have emerged as an important class of therapeutics, enabling researchers to  
614 target previously “undruggable” targets (Tsomaia, 2015). Hundreds of peptide and protein  
615 therapeutics have been approved by the U.S. Food and Drug Administration (Usmani *et al.*,  
616 2017) with applications in treating illnesses ranging from cancer to heart disease (Sikder *et al.*,  
617 2019; Chen *et al.*, 2012). Here, we sought to illustrate how one might use RAPPID to validate  
618 hypothesised interactions between target proteins and candidate therapeutic proteins and peptides  
619 through two examples: Trastuzumab and Pertuzumab.

620

621 Trastuzumab and Pertuzumab are two recombinant humanised monoclonal antibodies which are  
622 used in combination in the treatment of metastatic breast cancers which belong to the HER2-  
623 positive subtype (Boekhout *et al.*, 2011; Malenfant *et al.*, 2014). Both Trastuzumab and  
624 Pertuzumab target distinct domains of the human epidermal growth factor receptor 2 (HER2).  
625 We applied RAPPID, trained on our *H. sapiens* STRING C2 dataset (which is more appropriate  
626 for this application), to the sequences of the Trastuzumab and Pertuzumab antibody chains.

627 RAPPID predicted that HER2 interacts with Trastuzumab and Pertuzumab with 86.20% and  
628 95.11% probability, respectively. This suggests that RAPPID may be utilized as part of an  
629 interaction-based low-cost filtering or early validation step in the development of therapeutic  
630 proteins and peptides.

631

632

### 633 **Discussion and Conclusion**

634 This study introduced RAPPID, a deep learning method that addresses the challenges of  
635 creating generalisable PPI prediction models posed by inherent characteristics of PPI datasets.  
636 By adopting a modified AWD-LSTM training routine, RAPPID was able to surpass state-of-  
637 the-art models under testing conditions that carefully controlled for information leakage and  
638 other sources of prediction accuracy inflation. Further experiments were conducted to confirm  
639 the results were independent of the specific proteins present in the training and testing splits.  
640 RAPPID's ability to PPIs in the STRING database was shown to increase with strong biological  
641 evidence for the interaction. This relationship between PPI evidence and RAPPID predictive  
642 ability illustrates that RAPPID accurately reflects our confidence in interactions, and testing  
643 performance is not disproportionately inflated by spurious, low-confidence interactions.  
644 Moreover, assessment of the sequence similarity between testing and training proteins revealed  
645 that the superior performance of RAPPID is not due to the presence of highly similar protein  
646 pairs in testing and training, and the accuracy of RAPPID was largely stable with a small  
647 improvement when highly similar testing proteins were excluded.

648

649 Developing appropriate and meaningful benchmark datasets for PPI prediction remains a  
650 challenging problem for a number of reasons. Firstly, deep learning tasks rely on large, high-  
651 quality datasets to obtain meaningful generalised models. Such datasets are few and far between.  
652 Projects like HIPPIE and iRefWeb join STRING in being among the best examples of PPI  
653 datasets which integrate multiple sources to assure both quality and quantity of PPI edges  
654 (Alanis-Lobato *et al.*, 2017; Turner *et al.*, 2010). Despite this, STRING is the only dataset among  
655 these three which has an appropriate number of high-confidence edges for the purpose of  
656 learning deep learning model. Specifically, there are 98.5% fewer edges in HIPPIE than in  
657 STRING between human proteins at a 95% confidence threshold. Even when confidence  
658 thresholds are lowered to 85%, HIPPIE holds 87.9% fewer human edges than STRING.  
659 Similarly STRING at a 95% confidence threshold has 75% more human edges when considering  
660 iRefWeb edges with 3 supporting references or more.

661

662 Secondly, this reliance on large, representative datasets is further exacerbated by the unique  
663 overfitting challenges posed by the characteristics of PPI data, as explored in this work and in  
664 (Park and Marcotte, 2012). While RAPPID mitigates the overfitting tendencies of PPI data  
665 through regularisation, it also relies on large, representative training data to do so. In the  
666 construction of our C3 datasets, it is necessary to discard edges which are not between proteins  
667 of the same validation split. As a result, we observe a further decrease of up to 33.9% in the  
668 number of the already-precious-few edges afforded to us by STRING.

669

670 As we've shown in this work, the construction of benchmark datasets is critical for effectively  
671 comparing and evaluating PPI prediction tasks. It is thanks to large, quality PPI dataset projects



672 like STRING that we might construct meaningful and appropriate datasets against which to  
673 evaluate PPI prediction methods like RAPPID. Additional efforts and methodologies to collect  
674 and integrate PPI edges of the scale of STRING at high confidence levels are greatly desired, as  
675 they can help identify and mitigate biases that inevitably arise when constructing datasets.

676

677 The task of PPI prediction is related to the problem of protein docking inference, whereby  
678 computational models predict the atomic interactions between two proteins. While many  
679 methods have historically been based on the fast Fourier transform for energy evaluation (Desta  
680 *et al.*, 2020), new and effective deep learning methods have also become available. One such  
681 method is AlphaFold-multimer (Evans *et al.*, 2021), which builds upon a Transformer model for  
682 the prediction of protein structure (Jumper *et al.*, 2021) to infer the interface of homo and hetero  
683 protein dimers at an atomic level. Integrating docking predictions can be an interesting future  
684 direction to help improve RAPPID's PPI prediction generalisation.

685

686 RAPPID's ability to predict interactions warrants further study into relevant tasks that might  
687 benefit from a similar approach. The RAPPID architecture might be modified for the tasks of  
688 binding site and protein function prediction. These tasks are related to PPI prediction and as a  
689 result are exposed to similar challenges to which RAPPID is well suited. However, in all these  
690 cases, it is crucial to consider strict rules for cross-validation and data splitting to ensure data  
691 leakage is avoided.

692

693

694

695 **Funding:**

696 This work was supported by Natural Sciences and Engineering Research Council of Canada  
697 (NSERC) grant RGPIN-2019-04460 (AE), and by McGill Initiative in Computational Medicine  
698 (MiCM) (AE). This research was enabled in part by support provided by Calcul Québec  
699 ([www.calculquebec.ca](http://www.calculquebec.ca)) and Compute Canada ([www.computeCanada.ca](http://www.computeCanada.ca)).

700

701

702 **Authors' contributions:**

703 AE and JS conceived the study, designed the project and the algorithm, and wrote the  
704 manuscript. JS implemented the pipeline and performed the statistical analyses of the results. All  
705 authors read and approved the final manuscript.

706

707

708 **References**

709

710 Alanis-Lobato,G. *et al.* (2017) HIPPIE v2.0: enhancing meaningfulness and reliability of  
711 protein–protein interaction networks. *Nucleic Acids Res*, **45**, D408–D414.

712 Altschul,S.F. *et al.* (1990) Basic local alignment search tool. *Journal of Molecular Biology*, **215**,  
713 403–410.

714 Altschul,S.F. *et al.* (1997) Gapped BLAST and PSI-BLAST: a new generation of protein  
715 database search programs. *Nucleic Acids Research*, **25**, 3389–3402.

716 Anfinsen,C.B. (1973) Principles that Govern the Folding of Protein Chains. *Science*, **181**, 223–  
717 230.

718 Athiwaratkun,B. *et al.* (2019) There Are Many Consistent Explanations of Unlabeled Data: Why  
719 You Should Average. In, *ICLR*.

720 Ben-Hur,A. and Noble,W.S. (2006) Choosing negative examples for the prediction of protein-  
721 protein interactions. *BMC Bioinformatics*, **7**, S2–S2.

722 Ben-Hur,A. and Noble,W.S. (2005) Kernel methods for predicting protein–protein interactions.  
723 *Bioinformatics*, **21**, i38–i46.

724 Berman,H.M. (2000) The Protein Data Bank. *Nucleic Acids Research*, **28**, 235–242.

- 725 Blohm,P. *et al.* (2014) Negatome 2.0: a database of non-interacting proteins derived by literature  
726 mining, manual annotation and protein structure analysis. *Nucl. Acids Res.*, **42**, D396–  
727 D400.
- 728 Boekhout,A.H. *et al.* (2011) Trastuzumab. *Oncologist*, **16**, 800–810.
- 729 Brock,A. *et al.* (2021) High-Performance Large-Scale Image Recognition Without  
730 Normalization. *arXiv:2102.06171 [cs, stat]*.
- 731 Bromley,J. *et al.* (1993) Signature verification using a “siamese” time delay neural network. *Int.*  
732 *J. Patt. Recogn. Artif. Intell.*, **07**, 669–688.
- 733 Browne,F. *et al.* (2007) Supervised Statistical and Machine Learning Approaches to Inferring  
734 Pairwise and Module-Based Protein Interaction Networks. In, *2007 IEEE 7th*  
735 *International Symposium on BioInformatics and BioEngineering*. IEEE, Boston, MA,  
736 USA, pp. 1365–1369.
- 737 Carpenter,E.P. *et al.* (2008) Overcoming the challenges of membrane protein crystallography.  
738 *Current Opinion in Structural Biology*, **18**, 581–586.
- 739 Chen,H.H. *et al.* (2012) Novel Protein Therapeutics for Systolic Heart Failure: Chronic  
740 Subcutaneous B-Type Natriuretic Peptide. *Journal of the American College of*  
741 *Cardiology*, **60**, 2305–2312.
- 742 Chen,M. *et al.* (2019) Multifaceted protein–protein interaction prediction based on Siamese  
743 residual RCNN. *Bioinformatics*, **35**, i305–i314.
- 744 Cong,Q. *et al.* (2019) Protein interaction networks revealed by proteome coevolution. *Science*,  
745 **365**, 185–189.
- 746 Desta,I.T. *et al.* (2020) Performance and Its Limits in Rigid Body Protein-Protein Docking.  
747 *Structure*, **28**, 1071-1081.e3.
- 748 Devlin,J. *et al.* (2019) BERT: Pre-training of Deep Bidirectional Transformers for Language  
749 Understanding. *arXiv:1810.04805 [cs]*.
- 750 Dick,K. *et al.* (2020) PIPE4: Fast PPI Predictor for Comprehensive Inter- and Cross-Species  
751 Interactomes. *Scientific Reports*, **10**, 1390.
- 752 Ding,Y. *et al.* (2016) Predicting protein–protein interactions via multivariate mutual information  
753 of protein sequences. *BMC Bioinformatics*, **17**, 398.
- 754 Elnaggar,A. *et al.* (2021) ProtTrans: Towards Cracking the Language of Life’s Code Through  
755 Self-Supervised Learning.
- 756 Evans,R. *et al.* (2021) Protein complex prediction with AlphaFold-Multimer Bioinformatics.
- 757 Falcon,W. *et al.* (2020) PyTorchLightning/pytorch-lightning: 0.7.6 release Zenodo.
- 758 Gillis,J. *et al.* (2014) Bias tradeoffs in the creation and analysis of protein–protein interaction  
759 networks. *Journal of Proteomics*, **100**, 44–54.
- 760 Henikoff,S. and Henikoff,J.G. (1992) Amino acid substitution matrices from protein blocks.  
761 *Proceedings of the National Academy of Sciences*, **89**, 10915–10919.
- 762 Hochreiter,S. (1998) The Vanishing Gradient Problem During Learning Recurrent Neural Nets  
763 and Problem Solutions. *Int. J. Unc. Fuzz. Knowl. Based Syst.*, **06**, 107–116.
- 764 Hochreiter,S. and Schmidhuber,J. (1997) Long Short-Term Memory. *Neural Computation*, **9**,  
765 1735–1780.
- 766 Huttlin,E.L. *et al.* (2017) Architecture of the human interactome defines protein communities and  
767 disease networks. *Nature*, **545**, 505–509.

- 768 Izmailov,P. *et al.* (2019) Averaging Weights Leads to Wider Optima and Better Generalization.  
769 *arXiv:1803.05407 [cs, stat]*.
- 770 Jansen,R. (2003) A Bayesian Networks Approach for Predicting Protein-Protein Interactions  
771 from Genomic Data. *Science*, **302**, 449–453.
- 772 Jassal,B. *et al.* (2019) The reactome pathway knowledgebase. *Nucleic Acids Research*, gkz1031.
- 773 Jumper,J. *et al.* (2021) Highly accurate protein structure prediction with AlphaFold. *Nature*, **596**,  
774 583–589.
- 775 Kanehisa,M. (2000) KEGG: Kyoto Encyclopedia of Genes and Genomes. *Nucleic Acids*  
776 *Research*, **28**, 27–30.
- 777 Kudo,T. (2018) Subword Regularization: Improving Neural Network Translation Models with  
778 Multiple Subword Candidates. *arXiv:1804.10959 [cs]*.
- 779 Kudo,T. and Richardson,J. (2018) SentencePiece: A simple and language independent subword  
780 tokenizer and detokenizer for Neural Text Processing. In, *Proceedings of the 2018*  
781 *Conference on Empirical Methods in Natural Language Processing: System*  
782 *Demonstrations*. Association for Computational Linguistics, Brussels, Belgium, pp. 66–  
783 71.
- 784 Li,Y. and Ilie,L. (2017) SPRINT: ultrafast protein-protein interaction prediction of the entire  
785 human interactome. *BMC Bioinformatics*, **18**, 485.
- 786 Lipton,Z.C. *et al.* (2015) A Critical Review of Recurrent Neural Networks for Sequence  
787 Learning. *arXiv:1506.00019 [cs]*.
- 788 Loshchilov,I. and Hutter,F. (2019) Decoupled Weight Decay Regularization. In, *ICLR*.
- 789 Malenfant,S.J. *et al.* (2014) Pertuzumab: a new targeted therapy for HER2-positive metastatic  
790 breast cancer. *Pharmacotherapy*, **34**, 60–71.
- 791 Merity,S. *et al.* (2017) Regularizing and Optimizing LSTM Language Models.  
792 *arXiv:1708.02182 [cs]*.
- 793 Misra,D. (2020) Mish: A Self Regularized Non-Monotonic Activation Function.  
794 *arXiv:1908.08681 [cs, stat]*.
- 795 Orchard,S. *et al.* (2012) Protein interaction data curation: the International Molecular Exchange  
796 (IMEx) consortium. *Nature Methods*, **9**, 345–350.
- 797 Orchard,S. *et al.* (2014) The MIntAct project—IntAct as a common curation platform for 11  
798 molecular interaction databases. *Nucl. Acids Res.*, **42**, D358–D363.
- 799 Oughtred,R. *et al.* (2020) The BioGRID database: A comprehensive biomedical resource of  
800 curated protein, genetic, and chemical interactions. *Protein Science: A Publication of the*  
801 *Protein Society*, **30**, 187–200.
- 802 Park,Y. and Marcotte,E.M. (2012) Flaws in evaluation schemes for pair-input computational  
803 predictions. *Nat Methods*, **9**, 1134–1136.
- 804 Paszke,A. *et al.* (2019) PyTorch: An Imperative Style, High-Performance Deep Learning  
805 Library. In, Wallach,H. *et al.* (eds), *Advances in Neural Information Processing Systems*  
806 **32**. Curran Associates, Inc., pp. 8024–8035.
- 807 Richoux,F. *et al.* (2019) Comparing two deep learning sequence-based models for protein-  
808 protein interaction prediction. *arXiv:1901.06268 [cs, q-bio, stat]*.
- 809 Roux,K.J. *et al.* (2012) A promiscuous biotin ligase fusion protein identifies proximal and  
810 interacting proteins in mammalian cells. *Journal of Cell Biology*, **196**, 801–810.

- 811 Salwinski,L. *et al.* (2004) The Database of Interacting Proteins: 2004 update. *Nucleic Acids Res.*,  
812 **32**, D449-451.
- 813 Schuster,M. and Nakajima,K. (2012) Japanese and Korean voice search. In, *2012 IEEE*  
814 *International Conference on Acoustics, Speech and Signal Processing (ICASSP)*., pp.  
815 5149–5152.
- 816 Sikder,S. *et al.* (2019) Long-term delivery of protein and peptide therapeutics for cancer  
817 therapies. *Expert opinion on drug delivery*.
- 818 Snider,J. *et al.* (2015) Fundamentals of protein interaction network mapping. *Mol Syst Biol*, **11**,  
819 848.
- 820 Srivastava,N. *et al.* (2014) Dropout: a simple way to prevent neural networks from overfitting. *J.*  
821 *Mach. Learn. Res.*, **15**, 1929–1958.
- 822 Szklarczyk,D. *et al.* (2019) STRING v11: protein–protein association networks with increased  
823 coverage, supporting functional discovery in genome-wide experimental datasets. *Nucleic*  
824 *Acids Res*, **47**, D607–D613.
- 825 Tabe-Bordbar,S. *et al.* (2018) A closer look at cross-validation for assessing the accuracy of gene  
826 regulatory networks and models. *Sci Rep*, **8**, 6620.
- 827 Tsomaia,N. (2015) Peptide therapeutics: targeting the undruggable space. *European journal of*  
828 *medicinal chemistry*.
- 829 Turner,B. *et al.* (2010) iRefWeb: interactive analysis of consolidated protein interaction data and  
830 their supporting evidence. *Database*, **2010**, baq023–baq023.
- 831 Usmani,S. *et al.* (2017) THPdb: Database of FDA-approved peptide and protein therapeutics.  
832 *PloS one*.
- 833 Vaswani,A. *et al.* (2017) Attention is all you need. In, *Proceedings of the 31st International*  
834 *Conference on Neural Information Processing Systems, NIPS’17*. Curran Associates Inc.,  
835 Red Hook, NY, USA, pp. 6000–6010.
- 836 Vidal,M. and Fields,S. (2014) The yeast two-hybrid assay: still finding connections after 25  
837 years. *Nat Methods*, **11**, 1203–1206.
- 838 Wan,L. *et al.* (2013) Regularization of Neural Networks using DropConnect. In, Dasgupta,S. and  
839 McAllester,D. (eds), *Proceedings of the 30th International Conference on Machine*  
840 *Learning*, Proceedings of Machine Learning Research. PMLR, Atlanta, Georgia, USA,  
841 pp. 1058–1066.
- 842 Wright,L. and Demeure,N. (2021) Ranger21: a synergistic deep learning optimizer.  
843 *arXiv:2106.13731 [cs]*.
- 844 Yang,J. *et al.* (2012) BioLiP: a semi-manually curated database for biologically relevant ligand–  
845 protein interactions. *Nucleic Acids Research*, **41**, D1096–D1103.
- 846 Yong,H. *et al.* (2020) Gradient Centralization: A New Optimization Technique for Deep Neural  
847 Networks. In, *ECCV*.
- 848 Yosinski,J. *et al.* (2014) How transferable are features in deep neural networks? In,  
849 Ghahramani,Z. *et al.* (eds), *Advances in Neural Information Processing Systems 27*.  
850 Curran Associates, Inc., pp. 3320–3328.
- 851 Zaremba,W. *et al.* (2015) Recurrent Neural Network Regularization. *arXiv:1409.2329 [cs]*.
- 852 Zhang,M.R. *et al.* (2019) Lookahead Optimizer: k steps forward, 1 step back. In, *NeurIPS*.
